# Supplementary material for: Lipid composition: a “key factor” for the rational manipulation of the liposome–protein corona by liposome design
Source: Royal Society of Chemistry journal article supplement (doi:10.1039/c4ra13335h), 2014-12-11
Supplement: c4ra13335h1.pdf [file c4ra13335h1.pdf]

**Figure S1.** Comparison between the size distributions of DC-Chol-DOPE cationic liposomes and DC-Chol-DOPE-human plasma complexes as detected by dynamic light scattering.

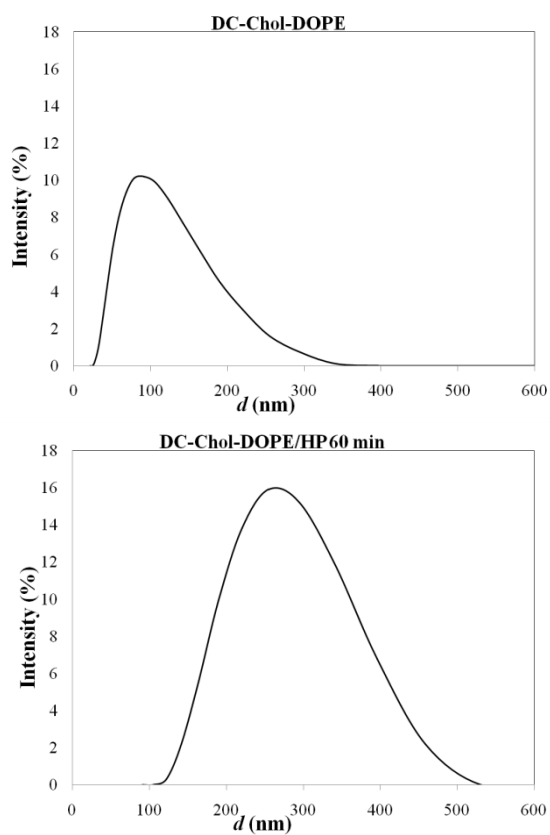

**Figure S2.** A distinction between cylindrical and lamellar shape can be made by investigating the power law of the form factor at low  $q$ . In the low  $q$  region, the SAXS intensity of pure DC-Chol (panel A, red circles) was well fitted by a power-law with  $I \approx q^{-3.8}$  (solid blue line) proper for a surface-fractal ( $3 < p < 4$ ). The SAXS intensity of DC-Chol-Cholesterol (panel B, red circles) shows a power law ( $I \approx q^{-2.2}$ , solid blue line) suggesting the presence of planar aggregates.

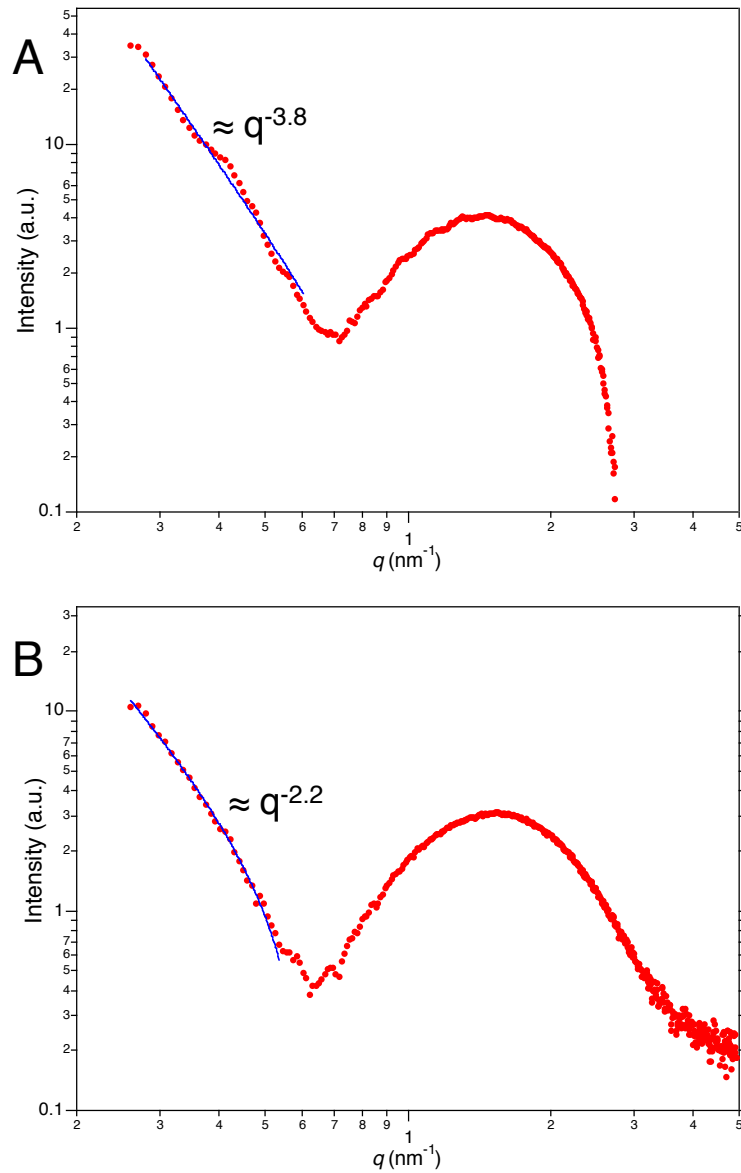

**Figure S3.** Relative protein abundance of the most abundant proteins found in the corona of DOTAP and DC-Chol CLs are compared by their relative ratio, R. Relative protein abundance was calculated by Eq. 1.

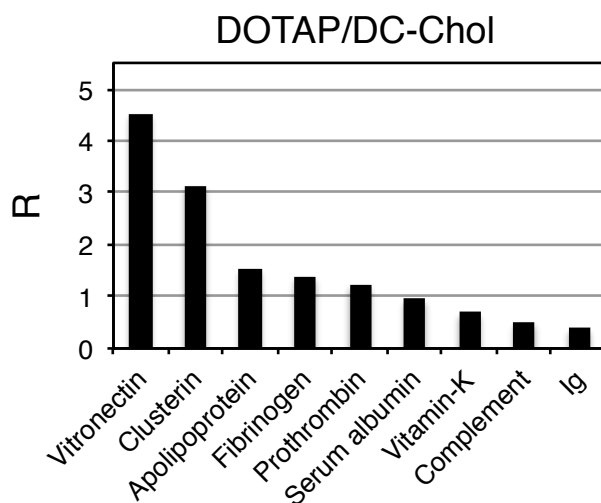

**Table S1.** The full list of all the plasma proteins adhering on the six liposomal formulations after 1 h incubation with HP as identified by NanoLC-MS/MS

| Identified proteins                                                     | RPA (DOTAP) |
|-------------------------------------------------------------------------|-------------|
| Vitronectin OS=Homo sapiens GN=VTN PE=1 SV=1                            | 13.33372417 |
| Fibrinogen beta chain OS=Homo sapiens GN=FGB PE=1 SV=2                  | 5.163829788 |
| Prothrombin OS=Homo sapiens GN=F2 PE=1 SV=2                             | 5.111775052 |
| Serum albumin OS=Homo sapiens GN=ALB PE=1 SV=2                          | 4.476103742 |
| Apolipoprotein A-II OS=Homo sapiens GN=APOA2 PE=1 SV=1                  | 4.120842173 |
| Fibrinogen gamma chain OS=Homo sapiens GN=FGG PE=1 SV=3                 | 3.158921619 |
| Ig kappa chain C region OS=Homo sapiens GN=IGKC PE=1 SV=1               | 3.157987303 |
| Ig lambda chain C regions OS=Homo sapiens GN=IGLC1 PE=1 SV=1            | 2.74281135  |
| Complement C3 OS=Homo sapiens GN=C3 PE=1 SV=2                           | 2.609528957 |
| Fibrinogen alpha chain OS=Homo sapiens GN=FGA PE=1 SV=2                 | 2.479339667 |
| Apolipoprotein C-II OS=Homo sapiens GN=APOC2 PE=1 SV=1                  | 2.318801866 |
| Clusterin OS=Homo sapiens GN=CLU PE=1 SV=1                              | 2.312431531 |
| Apolipoprotein C-III OS=Homo sapiens GN=APOC3 PE=1 SV=1                 | 2.053795938 |
| Vitamin K-dependent protein S OS=Homo sapiens GN=PROS1 PE=1 SV=1        | 1.955037063 |
| Apolipoprotein F OS=Homo sapiens GN=APOF PE=1 SV=1                      | 1.766706183 |
| Vitamin K-dependent protein C OS=Homo sapiens GN=PROC PE=1 SV=1         | 1.132390713 |
| Vitamin K-dependent protein Z OS=Homo sapiens GN=PROZ PE=1 SV=2         | 1.104485816 |
| Apolipoprotein A-I OS=Homo sapiens GN=APOA1 PE=1 SV=1                   | 1.062588284 |
| Apolipoprotein E OS=Homo sapiens GN=APOE PE=1 SV=1                      | 0.935250086 |
| Complement C1s subcomponent OS=Homo sapiens GN=C1S PE=1 SV=1            | 0.919949148 |
| Apolipoprotein B-100 OS=Homo sapiens GN=APOB PE=1 SV=1                  | 0.655607203 |
| Complement component C9 OS=Homo sapiens GN=C9 PE=1 SV=2                 | 0.439573324 |
| Ig heavy chain V-III region BRO OS=Homo sapiens PE=1 SV=1               | 0.29150652  |
| Complement factor B OS=Homo sapiens GN=CFB PE=1 SV=2                    | 0.262694829 |
| Apolipoprotein M OS=Homo sapiens GN=APOM PE=1 SV=2                      | 0.2429221   |
| Ig kappa chain V-IV region Len OS=Homo sapiens PE=1 SV=2                | 0.235447574 |
| Apolipoprotein A-IV OS=Homo sapiens GN=APOA4 PE=1 SV=3                  | 0.178142873 |
| Keratin, type I cytoskeletal 9 OS=Homo sapiens GN=KRT9 PE=1 SV=3        | 0.159858414 |
| Apolipoprotein(a) OS=Homo sapiens GN=LPA PE=1 SV=1                      | 0.147498808 |
| Immunoglobulin J chain OS=Homo sapiens GN=IGJ PE=1 SV=4                 | 0.14575326  |
| Complement C5 OS=Homo sapiens GN=C5 PE=1 SV=4                           | 0.144202694 |
| Apolipoprotein D OS=Homo sapiens GN=APOD PE=1 SV=1                      | 0.117990734 |
| Complement component C8 gamma chain OS=Homo sapiens GN=C8G PE=1 SV=3    | 0.099377223 |
| Apolipoprotein L1 OS=Homo sapiens GN=APOL1 PE=1 SV=5                    | 0.096064649 |
| Complement component C7 OS=Homo sapiens GN=C7 PE=1 SV=2                 | 0.083730596 |
| Complement component C8 beta chain OS=Homo sapiens GN=C8B PE=1 SV=3     | 0.078315185 |
| Complement component C6 OS=Homo sapiens GN=C6 PE=1 SV=3                 | 0.070794441 |
| Complement component C8 alpha chain OS=Homo sapiens GN=C8A PE=1 SV=2    | 0.06278602  |
| Complement C1q subcomponent subunit A OS=Homo sapiens GN=C1QA PE=1 SV=2 | 0.061664841 |
| Complement factor H OS=Homo sapiens GN=CFH PE=1 SV=4                    | 0.015728769 |
| Complement C1r subcomponent OS=Homo sapiens GN=C1R PE=1 SV=2            | 0.001821916 |

**Identified proteins****RPA (DOTAP-DOPE)**

|                                                                             |             |
|-----------------------------------------------------------------------------|-------------|
| Apolipoprotein C-III OS=Homo sapiens GN=APOC3 PE=1 SV=1                     | 16.79877353 |
| Vitronectin OS=Homo sapiens GN=VTN PE=1 SV=1                                | 8.933304392 |
| Serum albumin OS=Homo sapiens GN=ALB PE=1 SV=2                              | 8.559986641 |
| Clusterin OS=Homo sapiens GN=CLU PE=1 SV=1                                  | 3.749091478 |
| Apolipoprotein C-II OS=Homo sapiens GN=APOC2 PE=1 SV=1                      | 3.243776118 |
| Apolipoprotein A-I OS=Homo sapiens GN=APOA1 PE=1 SV=1                       | 2.006242501 |
| Apolipoprotein D OS=Homo sapiens GN=APOD PE=1 SV=1                          | 1.689628529 |
| Ig gamma-1 chain C region OS=Homo sapiens GN=IGHG1 PE=1 SV=1                | 1.555945372 |
| Apolipoprotein A-IV OS=Homo sapiens GN=APOA4 PE=1 SV=3                      | 1.43523502  |
| Ig kappa chain C region OS=Homo sapiens GN=IGKC PE=1 SV=1                   | 1.378755864 |
| Fibrinogen beta chain OS=Homo sapiens GN=FGB PE=1 SV=2                      | 1.320615556 |
| Apolipoprotein E OS=Homo sapiens GN=APOE PE=1 SV=1                          | 1.2126407   |
| Complement C3 OS=Homo sapiens GN=C3 PE=1 SV=2                               | 1.158719895 |
| Prothrombin OS=Homo sapiens GN=F2 PE=1 SV=2                                 | 1.130532347 |
| Ig gamma-2 chain C region OS=Homo sapiens GN=IGHG2 PE=1 SV=2                | 1.08528574  |
| Ig lambda-2 chain C regions OS=Homo sapiens GN=IGLC2 PE=1 SV=1              | 0.996690986 |
| Fibrinogen gamma chain OS=Homo sapiens GN=FGG PE=1 SV=3                     | 0.962190144 |
| Apolipoprotein C-I OS=Homo sapiens GN=APOC1 PE=1 SV=1                       | 0.908096232 |
| Apolipoprotein A-II OS=Homo sapiens GN=APOA2 PE=1 SV=1                      | 0.815474443 |
| Fibrinogen alpha chain OS=Homo sapiens GN=FGA PE=1 SV=2                     | 0.593817998 |
| Complement C4-B OS=Homo sapiens GN=C4B PE=1 SV=1                            | 0.488533509 |
| Apolipoprotein M OS=Homo sapiens GN=APOM PE=1 SV=2                          | 0.474614755 |
| Apolipoprotein F OS=Homo sapiens GN=APOF PE=1 SV=2                          | 0.472716296 |
| Ig mu chain C region OS=Homo sapiens GN=IGHM PE=1 SV=3                      | 0.431221406 |
| Apolipoprotein B-100 OS=Homo sapiens GN=APOB PE=1 SV=2                      | 0.415674225 |
| Keratin, type II cytoskeletal 1 OS=Homo sapiens GN=KRT1 PE=1 SV=6           | 0.407737222 |
| Vitamin K-dependent protein S OS=Homo sapiens GN=PROS1 PE=1 SV=1            | 0.374755811 |
| Keratin, type I cytoskeletal 9 OS=Homo sapiens GN=KRT9 PE=1 SV=3            | 0.344019147 |
| Keratin, type I cytoskeletal 10 OS=Homo sapiens GN=KRT10 PE=1 SV=6          | 0.297317989 |
| Ig kappa chain V-III region HAH OS=Homo sapiens PE=2 SV=1                   | 0.21357664  |
| Ig alpha-1 chain C region OS=Homo sapiens GN=IGHA1 PE=1 SV=2                | 0.204583939 |
| Keratin, type II cytoskeletal 2 epidermal OS=Homo sapiens GN=KRT2 PE=1 SV=2 | 0.193204714 |
| Complement component C9 OS=Homo sapiens GN=C9 PE=1 SV=2                     | 0.189845902 |
| Vitamin K-dependent protein Z OS=Homo sapiens GN=PROZ PE=1 SV=2             | 0.172759771 |
| Complement component C8 gamma chain OS=Homo sapiens GN=C8G PE=1 SV=3        | 0.163094889 |
| Complement C5 OS=Homo sapiens GN=C5 PE=1 SV=4                               | 0.146322719 |
| Ig heavy chain V-III region VH26 OS=Homo sapiens PE=1 SV=1                  | 0.12266966  |
| Ig kappa chain V-IV region Len OS=Homo sapiens PE=1 SV=2                    | 0.12266966  |
| Vitamin K-dependent protein C OS=Homo sapiens GN=PROC PE=1 SV=1             | 0.111169379 |
| Complement factor B OS=Homo sapiens GN=CFB PE=1 SV=2                        | 0.106622757 |
| Ig kappa chain V-I region AG OS=Homo sapiens PE=1 SV=1                      | 0.099669099 |
| Apolipoprotein L1 OS=Homo sapiens GN=APOL1 PE=1 SV=5                        | 0.067956204 |
| Complement factor H OS=Homo sapiens GN=CFH PE=1 SV=4                        | 0.063099861 |
| Complement component C7 OS=Homo sapiens GN=C7 PE=1 SV=2                     | 0.050894859 |
| Complement component C6 OS=Homo sapiens GN=C6 PE=1 SV=3                     | 0.045563016 |
| Keratin, type I cytoskeletal 14 OS=Homo sapiens GN=KRT14 PE=1 SV=4          | 0.034500842 |
| Complement C1q subcomponent subunit C OS=Homo sapiens GN=C1QC PE=1 SV=3     | 0.030667415 |
| Complement C1s subcomponent OS=Homo sapiens GN=C1S PE=1 SV=1                | 0.028476885 |
| Keratin, type II cytoskeletal 6A OS=Homo sapiens GN=KRT6A PE=1 SV=3         | 0.023256123 |
| Keratin, type I cytoskeletal 17 OS=Homo sapiens GN=KRT17 PE=1 SV=2          | 0.020764396 |
| Apolipoprotein(a) OS=Homo sapiens GN=LPA PE=1 SV=1                          | 0.020689793 |
| Keratin, type I cytoskeletal 16 OS=Homo sapiens GN=KRT16 PE=1 SV=4          | 0.015634368 |
| Apolipoprotein A-V OS=Homo sapiens GN=APOA5 PE=1 SV=1                       | 0.009723814 |

**Identified proteins****RPA (DOTAP-cholesterol)**

|                                                                             |             |
|-----------------------------------------------------------------------------|-------------|
| Serum albumin OS=Homo sapiens GN=ALB PE=1 SV=2                              | 4.153882021 |
| Complement C3 OS=Homo sapiens GN=C3 PE=1 SV=2                               | 3.145329957 |
| Apolipoprotein A-I OS=Homo sapiens GN=APOA1 PE=1 SV=1                       | 3.012294983 |
| Vitronectin OS=Homo sapiens GN=VTN PE=1 SV=1                                | 2.665397605 |
| Fibrinogen beta chain OS=Homo sapiens GN=FGB PE=1 SV=2                      | 2.650245815 |
| Ig kappa chain C region OS=Homo sapiens GN=IGKC PE=1 SV=1                   | 2.448661122 |
| Apolipoprotein E OS=Homo sapiens GN=APOE PE=1 SV=1                          | 2.344904295 |
| Apolipoprotein C-III OS=Homo sapiens GN=APOC3 PE=1 SV=1                     | 2.127958201 |
| Ig lambda-2 chain C regions OS=Homo sapiens GN=IGLC2 PE=1 SV=1              | 1.969493229 |
| Apolipoprotein A-II OS=Homo sapiens GN=APOA2 PE=1 SV=1                      | 1.924217523 |
| Fibrinogen gamma chain OS=Homo sapiens GN=FGG PE=1 SV=3                     | 1.901144326 |
| Apolipoprotein A-IV OS=Homo sapiens GN=APOA4 PE=1 SV=3                      | 1.64904184  |
| Ig gamma-1 chain C region OS=Homo sapiens GN=IGHG1 PE=1 SV=1                | 1.618606504 |
| Keratin, type II cytoskeletal 1 OS=Homo sapiens GN=KRT1 PE=1 SV=6           | 1.546919969 |
| Apolipoprotein C-I OS=Homo sapiens GN=APOC1 PE=1 SV=1                       | 1.466429824 |
| Fibrinogen alpha chain OS=Homo sapiens GN=FGA PE=1 SV=2                     | 1.394491758 |
| Ig gamma-2 chain C region OS=Homo sapiens GN=IGHG2 PE=1 SV=2                | 1.33500451  |
| Apolipoprotein B-100 OS=Homo sapiens GN=APOB PE=1 SV=2                      | 1.216126533 |
| Apolipoprotein C-II OS=Homo sapiens GN=APOC2 PE=1 SV=1                      | 1.19980622  |
| Keratin, type II cytoskeletal 2 epidermal OS=Homo sapiens GN=KRT2 PE=1 SV=2 | 1.156968436 |
| Keratin, type I cytoskeletal 10 OS=Homo sapiens GN=KRT10 PE=1 SV=6          | 1.126904659 |
| Complement C4-B OS=Homo sapiens GN=C4B PE=1 SV=1                            | 0.985743618 |
| Keratin, type I cytoskeletal 9 OS=Homo sapiens GN=KRT9 PE=1 SV=3            | 0.963934395 |
| Ig kappa chain V-III region HAH OS=Homo sapiens PE=2 SV=1                   | 0.924918002 |
| Apolipoprotein D OS=Homo sapiens GN=APOD PE=1 SV=1                          | 0.913060079 |
| Clusterin OS=Homo sapiens GN=CLU PE=1 SV=1                                  | 0.881134902 |
| Prothrombin OS=Homo sapiens GN=F2 PE=1 SV=2                                 | 0.825311448 |
| Ig mu chain C region OS=Homo sapiens GN=IGHM PE=1 SV=3                      | 0.726721288 |
| Complement component C9 OS=Homo sapiens GN=C9 PE=1 SV=2                     | 0.596848796 |
| Keratin, type II cytoskeletal 5 OS=Homo sapiens GN=KRT5 PE=1 SV=3           | 0.566311457 |
| Apolipoprotein L1 OS=Homo sapiens GN=APOL1 PE=1 SV=5                        | 0.554627404 |
| Keratin, type I cytoskeletal 14 OS=Homo sapiens GN=KRT14 PE=1 SV=4          | 0.507610324 |
| Ig alpha-1 chain C region OS=Homo sapiens GN=IGHA1 PE=1 SV=2                | 0.498032771 |
| Ig kappa chain V-I region EU OS=Homo sapiens PE=1 SV=1                      | 0.435778674 |
| Complement C5 OS=Homo sapiens GN=C5 PE=1 SV=4                               | 0.421208567 |
| Complement C1q subcomponent subunit B OS=Homo sapiens GN=C1QB PE=1 SV=3     | 0.396581651 |
| Apolipoprotein A-V OS=Homo sapiens GN=APOA5 PE=1 SV=1                       | 0.376561363 |
| Vitamin K-dependent protein Z OS=Homo sapiens GN=PROZ PE=1 SV=2             | 0.354156637 |
| Ig kappa chain V-IV region B17 OS=Homo sapiens PE=2 SV=1                    | 0.348622939 |
| Keratin, type I cytoskeletal 16 OS=Homo sapiens GN=KRT16 PE=1 SV=4          | 0.341787195 |
| Apolipoprotein C-IV OS=Homo sapiens GN=APOC4 PE=1 SV=1                      | 0.332021847 |
| Apolipoprotein F OS=Homo sapiens GN=APOF PE=1 SV=2                          | 0.327278678 |
| Vitamin K-dependent protein S OS=Homo sapiens GN=PROS1 PE=1 SV=1            | 0.308780318 |
| Ig heavy chain V-III region VH26 OS=Homo sapiens PE=1 SV=1                  | 0.306481705 |
| Complement component C8 gamma chain OS=Homo sapiens GN=C8G PE=1 SV=3        | 0.305611018 |
| Complement C1q subcomponent subunit C OS=Homo sapiens GN=C1QC PE=1 SV=3     | 0.296904152 |
| Complement factor B OS=Homo sapiens GN=CFB PE=1 SV=2                        | 0.280867318 |
| Complement factor H OS=Homo sapiens GN=CFH PE=1 SV=4                        | 0.256182324 |
| Vitamin K-dependent protein C OS=Homo sapiens GN=PROC PE=1 SV=1             | 0.239438832 |
| Keratin, type II cytoskeletal 6A OS=Homo sapiens GN=KRT6A PE=1 SV=3         | 0.215814201 |
| Immunoglobulin lambda-like polypeptide 5 OS=Homo sapiens GN=IGLL5 PE=2 SV=2 | 0.194882388 |
| Complement component C6 OS=Homo sapiens GN=C6 PE=1 SV=3                     | 0.168382508 |
| Complement component C8 beta chain OS=Homo sapiens GN=C8B PE=1 SV=3         | 0.167249811 |
| Complement component C7 OS=Homo sapiens GN=C7 PE=1 SV=2                     | 0.132455524 |
| Apolipoprotein(a) OS=Homo sapiens GN=LPA PE=1 SV=1                          | 0.099904777 |

|                                                                          |             |
|--------------------------------------------------------------------------|-------------|
| Ig heavy chain V-III region GAL OS=Homo sapiens PE=1 SV=1                | 0.095775533 |
| Complement C1s subcomponent OS=Homo sapiens GN=C1S PE=1 SV=1             | 0.084083455 |
| Ig lambda chain V-III region LOI OS=Homo sapiens PE=1 SV=1               | 0.083005462 |
| Ig kappa chain V-II region GM607 (Fragment) OS=Homo sapiens PE=4 SV=1    | 0.076620426 |
| Complement C1r subcomponent OS=Homo sapiens GN=C1R PE=1 SV=2             | 0.046690572 |
| Complement component C8 alpha chain OS=Homo sapiens GN=C8A PE=1 SV=2     | 0.042141234 |
| Ig heavy chain V-I region V35 OS=Homo sapiens PE=1 SV=1                  | 0.038310213 |
| Complement factor H-related protein 5 OS=Homo sapiens GN=CFHR5 PE=1 SV=1 | 0.031127048 |
| Apolipoprotein M OS=Homo sapiens GN=APOM PE=1 SV=2                       | 0.023715846 |
| Complement factor I OS=Homo sapiens GN=CFI PE=1 SV=2                     | 0.022637853 |

**Identified Proteins****RPA (DC-Chol)**

|                                                                                 |             |
|---------------------------------------------------------------------------------|-------------|
| Complement C4-B OS=Homo sapiens GN=C4B PE=1 SV=1                                | 5.484551909 |
| Serum albumin OS=Homo sapiens GN=ALB PE=1 SV=2                                  | 4.662730363 |
| Inter-alpha-trypsin inhibitor heavy chain H2 OS=Homo sapiens GN=ITIH2 PE=1 SV=2 | 4.491031912 |
| Prothrombin OS=Homo sapiens GN=F2 PE=1 SV=2                                     | 4.130511464 |
| Ig gamma-1 chain C region OS=Homo sapiens GN=IGHG1 PE=1 SV=1                    | 4.060356653 |
| Fibrinogen beta chain OS=Homo sapiens GN=FGB PE=1 SV=2                          | 3.985890653 |
| Vitamin K-dependent protein S OS=Homo sapiens GN=PROS1 PE=1 SV=1                | 3.733333333 |
| Ig kappa chain C region OS=Homo sapiens GN=IGKC PE=1 SV=1                       | 3.683127572 |
| C4b-binding protein alpha chain OS=Homo sapiens GN=C4BPA PE=1 SV=2              | 3.239358762 |
| Vitronectin OS=Homo sapiens GN=VTN PE=1 SV=1                                    | 2.944673068 |
| Apolipoprotein A-I OS=Homo sapiens GN=APOA1 PE=1 SV=1                           | 2.867383513 |
| Inter-alpha-trypsin inhibitor heavy chain H1 OS=Homo sapiens GN=ITIH1 PE=1 SV=3 | 2.498472069 |
| Ig gamma-3 chain C region OS=Homo sapiens GN=IGHG3 PE=1 SV=2                    | 2.46311352  |
| Complement C3 OS=Homo sapiens GN=C3 PE=1 SV=2                                   | 2.389912194 |
| Inter-alpha-trypsin inhibitor heavy chain H3 OS=Homo sapiens GN=ITIH3 PE=1 SV=2 | 2.303703704 |
| Fibrinogen gamma chain OS=Homo sapiens GN=FGG PE=1 SV=3                         | 2.141500475 |
| Protein AMBP OS=Homo sapiens GN=AMBP PE=1 SV=1                                  | 1.836024058 |
| Ig gamma-2 chain C region OS=Homo sapiens GN=IGHG2 PE=1 SV=2                    | 1.803840878 |
| Fibrinogen alpha chain OS=Homo sapiens GN=FGA PE=1 SV=2                         | 1.606237817 |
| Ig lambda-2 chain C regions OS=Homo sapiens GN=IGLC2 PE=1 SV=1                  | 1.593714927 |
| Vitamin K-dependent protein Z OS=Homo sapiens GN=PROZ PE=1 SV=2                 | 1.404663923 |
| Protein Z-dependent protease inhibitor OS=Homo sapiens GN=SERPINA10 PE=1 SV=    | 1.249092229 |
| Apolipoprotein A-II OS=Homo sapiens GN=APOA2 PE=1 SV=1                          | 1.01010101  |
| Apolipoprotein E OS=Homo sapiens GN=APOE PE=1 SV=1                              | 0.953360768 |
| Vitamin K-dependent protein C OS=Homo sapiens GN=PROC PE=1 SV=1                 | 0.930674264 |
| Alpha-1-antitrypsin OS=Homo sapiens GN=SERPINA1 PE=1 SV=3                       | 0.903598634 |
| Keratin, type II cytoskeletal 1 OS=Homo sapiens GN=KRT1 PE=1 SV=6               | 0.860456416 |
| Apolipoprotein C-II OS=Homo sapiens GN=APOC2 PE=1 SV=1                          | 0.852974186 |
| Ig mu chain C region OS=Homo sapiens GN=IGHM PE=1 SV=3                          | 0.836482741 |
| Coagulation factor IX OS=Homo sapiens GN=F9 PE=1 SV=2                           | 0.821462488 |
| Apolipoprotein B-100 OS=Homo sapiens GN=APOB PE=1 SV=2                          | 0.813953488 |
| C-reactive protein OS=Homo sapiens GN=CRP PE=1 SV=1                             | 0.790123457 |
| Apolipoprotein C-III OS=Homo sapiens GN=APOC3 PE=1 SV=1                         | 0.785634119 |
| Collectin-11 OS=Homo sapiens GN=COLEC11 PE=1 SV=1                               | 0.749255002 |
| Clusterin OS=Homo sapiens GN=CLU PE=1 SV=1                                      | 0.735992403 |
| Hyaluronan-binding protein 2 OS=Homo sapiens GN=HABP2 PE=1 SV=1                 | 0.732902214 |
| Ig alpha-1 chain C region OS=Homo sapiens GN=IGHA1 PE=1 SV=2                    | 0.675763483 |
| Hemoglobin subunit beta OS=Homo sapiens GN=HBB PE=1 SV=2                        | 0.663580247 |
| Coagulation factor X OS=Homo sapiens GN=F10 PE=1 SV=2                           | 0.610549944 |
| Apolipoprotein A-IV OS=Homo sapiens GN=APOA4 PE=1 SV=3                          | 0.609053498 |
| Keratin, type I cytoskeletal 10 OS=Homo sapiens GN=KRT10 PE=1 SV=6              | 0.581711655 |
| Serum paraoxonase/arylesterase 1 OS=Homo sapiens GN=PON1 PE=1 SV=3              | 0.580246914 |
| Lumican OS=Homo sapiens GN=LUM PE=1 SV=2                                        | 0.558804418 |
| Serotransferrin OS=Homo sapiens GN=TF PE=1 SV=3                                 | 0.557960558 |
| Keratin, type II cytoskeletal 2 epidermal OS=Homo sapiens GN=KRT2 PE=1 SV=2     | 0.531813865 |
| Alpha-2-macroglobulin OS=Homo sapiens GN=A2M PE=1 SV=3                          | 0.518064076 |
| Alpha-1-acid glycoprotein 1 OS=Homo sapiens GN=ORM1 PE=1 SV=1                   | 0.514403292 |
| Hemoglobin subunit alpha OS=Homo sapiens GN=HBA1 PE=1 SV=2                      | 0.510288066 |
| Angiotensinogen OS=Homo sapiens GN=AGT PE=1 SV=1                                | 0.49382716  |
| C4b-binding protein beta chain OS=Homo sapiens GN=C4BPB PE=1 SV=1               | 0.49382716  |
| Heparin cofactor 2 OS=Homo sapiens GN=SERPIND1 PE=1 SV=3                        | 0.467836257 |
| Coagulation factor VII OS=Homo sapiens GN=F7 PE=1 SV=1                          | 0.441595442 |
| Immunoglobulin lambda-like polypeptide 5 OS=Homo sapiens GN=IGLL5 PE=2 SV=2     | 0.418679549 |
| Keratin, type I cytoskeletal 9 OS=Homo sapiens GN=KRT9 PE=1 SV=3                | 0.394265233 |
| Apolipoprotein F OS=Homo sapiens GN=APOF PE=1 SV=2                              | 0.388007055 |



|                                                                                  |             |
|----------------------------------------------------------------------------------|-------------|
| Haptoglobin OS=Homo sapiens GN=HP PE=1 SV=1                                      | 0.384087791 |
| Actin, cytoplasmic 1 OS=Homo sapiens GN=ACTB PE=1 SV=1                           | 0.364491476 |
| Histidine-rich glycoprotein OS=Homo sapiens GN=HRG PE=1 SV=1                     | 0.358024691 |
| Tubulin alpha-4A chain OS=Homo sapiens GN=TUBA4A PE=1 SV=1                       | 0.345679012 |
| Ig kappa chain V-III region HAH OS=Homo sapiens PE=2 SV=1                        | 0.335097002 |
| Collectin-10 OS=Homo sapiens GN=COLEC10 PE=2 SV=2                                | 0.310633214 |
| Haptoglobin-related protein OS=Homo sapiens GN=HPR PE=1 SV=2                     | 0.310224755 |
| Tubulin alpha-1B chain OS=Homo sapiens GN=TUBA1B PE=1 SV=1                       | 0.301234568 |
| Profilin-1 OS=Homo sapiens GN=PFN1 PE=1 SV=2                                     | 0.296296296 |
| Complement factor I OS=Homo sapiens GN=CFI PE=1 SV=2                             | 0.295548073 |
| Ig heavy chain V-III region VH26 OS=Homo sapiens PE=1 SV=1                       | 0.284900285 |
| Cartilage oligomeric matrix protein OS=Homo sapiens GN=COMP PE=1 SV=2            | 0.282611929 |
| Lipopolysaccharide-binding protein OS=Homo sapiens GN=LBP PE=1 SV=3              | 0.279524808 |
| Complement component C9 OS=Homo sapiens GN=C9 PE=1 SV=2                          | 0.278267686 |
| Myosin light polypeptide 6 OS=Homo sapiens GN=MYL6 PE=1 SV=2                     | 0.275962237 |
| Tubulin beta-1 chain OS=Homo sapiens GN=TUBB1 PE=1 SV=1                          | 0.271604938 |
| Kininogen-1 OS=Homo sapiens GN=KNG1 PE=1 SV=2                                    | 0.270919067 |
| Angiopoietin-related protein 6 OS=Homo sapiens GN=ANGPTL6 PE=1 SV=1              | 0.265906933 |
| Mannan-binding lectin serine protease 1 OS=Homo sapiens GN=MASP1 PE=1 SV=3       | 0.262541022 |
| Secreted phosphoprotein 24 OS=Homo sapiens GN=SPP2 PE=1 SV=1                     | 0.257201646 |
| Tubulin beta chain OS=Homo sapiens GN=TUBB PE=1 SV=2                             | 0.251851852 |
| Alpha-1-acid glycoprotein 2 OS=Homo sapiens GN=ORM2 PE=1 SV=2                    | 0.226337449 |
| Ig kappa chain V-III region VG (Fragment) OS=Homo sapiens PE=1 SV=1              | 0.208926876 |
| Fibronectin OS=Homo sapiens GN=FN1 PE=1 SV=4                                     | 0.208421349 |
| Endoplasmin OS=Homo sapiens GN=HSP90B1 PE=1 SV=1                                 | 0.203972088 |
| Plasma protease C1 inhibitor OS=Homo sapiens GN=SERPING1 PE=1 SV=2               | 0.193041526 |
| Apolipoprotein C-I OS=Homo sapiens GN=APOC1 PE=1 SV=1                            | 0.192043896 |
| Complement C5 OS=Homo sapiens GN=C5 PE=1 SV=4                                    | 0.191752036 |
| Complement C1q subcomponent subunit C OS=Homo sapiens GN=C1QC PE=1 SV=3          | 0.180436847 |
| Ras-related protein Rap-1A OS=Homo sapiens GN=RAP1A PE=1 SV=1                    | 0.176366843 |
| Gelsolin OS=Homo sapiens GN=GSN PE=1 SV=1                                        | 0.163652024 |
| Glucosidase 2 subunit beta OS=Homo sapiens GN=PRKCSH PE=1 SV=2                   | 0.163214062 |
| Extracellular superoxide dismutase [Cu-Zn] OS=Homo sapiens GN=SOD3 PE=1 SV=2     | 0.161443495 |
| Transthyretin OS=Homo sapiens GN=TTR PE=1 SV=1                                   | 0.154320988 |
| Ig kappa chain V-IV region Len OS=Homo sapiens PE=1 SV=2                         | 0.151946819 |
| Thrombospondin-1 OS=Homo sapiens GN=THBS1 PE=1 SV=2                              | 0.151210642 |
| 78 glucose-regulated protein OS=Homo sapiens GN=HSPA5 PE=1 SV=2                  | 0.150891632 |
| Hemopexin OS=Homo sapiens GN=HPX PE=1 SV=2                                       | 0.147198481 |
| Kallistatin OS=Homo sapiens GN=SERPINA4 PE=1 SV=3                                | 0.146132527 |
| Alpha-1-antichymotrypsin OS=Homo sapiens GN=SERPINA3 PE=1 SV=2                   | 0.133744856 |
| Proprotein convertase subtilisin/kexin type 9 OS=Homo sapiens GN=PCSK9 PE=1 SV=3 | 0.1334668   |
| Tropomyosin alpha-4 chain OS=Homo sapiens GN=TPM4 PE=1 SV=3                      | 0.127713921 |
| 14-3-3 protein zeta/delta OS=Homo sapiens GN=YWHAZ PE=1 SV=1                     | 0.12345679  |
| Alpha-1B-glycoprotein OS=Homo sapiens GN=A1BG PE=1 SV=4                          | 0.12345679  |
| Inter-alpha-trypsin inhibitor heavy chain H4 OS=Homo sapiens GN=ITIH4 PE=1 SV=4  | 0.122258181 |
| Osteomodulin OS=Homo sapiens GN=OMD PE=1 SV=1                                    | 0.120937264 |
| Complement C1q subcomponent subunit B OS=Homo sapiens GN=C1QB PE=1 SV=3          | 0.118884316 |
| Apolipoprotein M OS=Homo sapiens GN=APOM PE=1 SV=2                               | 0.117577895 |
| Complement C1r subcomponent OS=Homo sapiens GN=C1R PE=1 SV=2                     | 0.117283951 |
| Antithrombin-III OS=Homo sapiens GN=SERPINC1 PE=1 SV=1                           | 0.111809923 |
| Immunoglobulin J chain OS=Homo sapiens GN=IGJ PE=1 SV=4                          | 0.109739369 |
| Ig lambda chain V-III region LOI OS=Homo sapiens PE=1 SV=1                       | 0.102880658 |
| Alpha-2-HS-glycoprotein OS=Homo sapiens GN=AHSG PE=1 SV=1                        | 0.101297879 |
| Thrombospondin-4 OS=Homo sapiens GN=THBS4 PE=1 SV=2                              | 0.100163056 |
| Apolipoprotein L1 OS=Homo sapiens GN=APOL1 PE=1 SV=5                             | 0.095398429 |
| Vitamin D-binding protein OS=Homo sapiens GN=GC PE=1 SV=1                        | 0.093174936 |

|                                                                                        |             |
|----------------------------------------------------------------------------------------|-------------|
| Apolipoprotein A-V OS=Homo sapiens GN=APOA5 PE=1 SV=1                                  | 0.090334237 |
| Complement component C6 OS=Homo sapiens GN=C6 PE=1 SV=3                                | 0.0893592   |
| Keratin, type II cytoskeletal 5 OS=Homo sapiens GN=KRT5 PE=1 SV=3                      | 0.087614496 |
| Ceruloplasmin OS=Homo sapiens GN=CP PE=1 SV=1                                          | 0.087026918 |
| Plasminogen OS=Homo sapiens GN=PLG PE=1 SV=2                                           | 0.086826753 |
| Myosin-9 OS=Homo sapiens GN=MYH9 PE=1 SV=4                                             | 0.082667102 |
| Ig kappa chain V-I region AG OS=Homo sapiens PE=1 SV=1                                 | 0.082304527 |
| Protein disulfide-isomerase OS=Homo sapiens GN=P4HB PE=1 SV=3                          | 0.082304527 |
| Complement C1s subcomponent OS=Homo sapiens GN=C1S PE=1 SV=1                           | 0.076960077 |
| Integrin alpha-IIb OS=Homo sapiens GN=ITGA2B PE=1 SV=3                                 | 0.072107506 |
| Alpha-2-antiplasmin OS=Homo sapiens GN=SERPINF2 PE=1 SV=3                              | 0.071829405 |
| Apolipoprotein C-IV OS=Homo sapiens GN=APOC4 PE=1 SV=1                                 | 0.065843621 |
| Serum amyloid A-4 protein OS=Homo sapiens GN=SAA4 PE=1 SV=2                            | 0.065843621 |
| Selenoprotein P OS=Homo sapiens GN=SEPP1 PE=1 SV=3                                     | 0.063163939 |
| Pleckstrin OS=Homo sapiens GN=PLEK PE=1 SV=3                                           | 0.061728395 |
| Coagulation factor V OS=Homo sapiens GN=F5 PE=1 SV=4                                   | 0.060748579 |
| Thyroxine-binding globulin OS=Homo sapiens GN=SERPINA7 PE=1 SV=2                       | 0.053676865 |
| SPARC-like protein 1 OS=Homo sapiens GN=SPARCL1 PE=1 SV=2                              | 0.052674897 |
| Complement component C8 beta chain OS=Homo sapiens GN=C8B PE=1 SV=3                    | 0.051593882 |
| Complement factor H OS=Homo sapiens GN=CFH PE=1 SV=4                                   | 0.051514344 |
| Nidogen-1 OS=Homo sapiens GN=NID1 PE=1 SV=3                                            | 0.050835149 |
| Integrin-linked protein kinase OS=Homo sapiens GN=ILK PE=1 SV=2                        | 0.048414427 |
| Extracellular matrix protein 2 OS=Homo sapiens GN=ECM2 PE=2 SV=1                       | 0.046296296 |
| Talin-1 OS=Homo sapiens GN=TLN1 PE=1 SV=3                                              | 0.044810242 |
| Fermitin family homolog 3 OS=Homo sapiens GN=FERMT3 PE=1 SV=1                          | 0.042235218 |
| Phospholipid transfer protein OS=Homo sapiens GN=PLTP PE=1 SV=1                        | 0.04040404  |
| Bone marrow proteoglycan OS=Homo sapiens GN=PRG2 PE=1 SV=2                             | 0.039506173 |
| Myosin regulatory light chain 12A OS=Homo sapiens GN=MYL12A PE=1 SV=2                  | 0.037037037 |
| Intelectin-1 OS=Homo sapiens GN=ITLN1 PE=1 SV=1                                        | 0.035273369 |
| Apolipoprotein D OS=Homo sapiens GN=APOD PE=1 SV=1                                     | 0.035273369 |
| Proteasome subunit alpha type-4 OS=Homo sapiens GN=PSMA4 PE=1 SV=1                     | 0.034057046 |
| Retinol-binding protein 4 OS=Homo sapiens GN=RBP4 PE=1 SV=3                            | 0.032206119 |
| Complement factor B OS=Homo sapiens GN=CFB PE=1 SV=2                                   | 0.03158197  |
| Glutathione peroxidase 3 OS=Homo sapiens GN=GPX3 PE=1 SV=2                             | 0.028490028 |
| Complement component C8 alpha chain OS=Homo sapiens GN=C8A PE=1 SV=2                   | 0.026590693 |
| Insulin-like growth factor-binding protein complex acid labile subunit OS=Homo sapiens | 0.026187804 |
| Afamin OS=Homo sapiens GN=AFM PE=1 SV=1                                                | 0.025049204 |
| Sex hormone-binding globulin OS=Homo sapiens GN=SHBG PE=1 SV=2                         | 0.022446689 |
| Apolipoprotein(a) OS=Homo sapiens GN=LPA PE=1 SV=1                                     | 0.021192184 |
| Dickkopf-related protein 3 OS=Homo sapiens GN=DKK3 PE=1 SV=2                           | 0.019493177 |
| Filamin-A OS=Homo sapiens GN=FLNA PE=1 SV=4                                            | 0.019331312 |
| Collagen alpha-1(XVIII) chain OS=Homo sapiens GN=COL18A1 PE=1 SV=5                     | 0.018033014 |
| Endosialin OS=Homo sapiens GN=CD248 PE=1 SV=1                                          | 0.015241579 |
| Integrin beta-3 OS=Homo sapiens GN=ITGB3 PE=1 SV=2                                     | 0.014190436 |
| Carboxypeptidase N subunit 2 OS=Homo sapiens GN=CPN2 PE=1 SV=3                         | 0.012143291 |
| CD44 antigen OS=Homo sapiens GN=CD44 PE=1 SV=3                                         | 0.012044565 |
| von Willebrand factor OS=Homo sapiens GN=VWF PE=1 SV=4                                 | 0.011986096 |
| Calreticulin OS=Homo sapiens GN=CALR PE=1 SV=1                                         | 0.010288066 |
| Band 3 anion transport protein OS=Homo sapiens GN=SLC4A1 PE=1 SV=3                     | 0.009682885 |
| N-acetylmuramoyl-L-alanine amidase OS=Homo sapiens GN=PGLYRP2 PE=1 SV=1                | 0.007964954 |
| Vinculin OS=Homo sapiens GN=VCL PE=1 SV=4                                              | 0.007964954 |
| Neural cell adhesion molecule 1 OS=Homo sapiens GN=NCAM1 PE=1 SV=3                     | 0.007797271 |
| Proteoglycan 4 OS=Homo sapiens GN=PRG4 PE=1 SV=2                                       | 0.006540757 |
| Neuropilin-1 OS=Homo sapiens GN=NRP1 PE=1 SV=3                                         | 0.004794438 |
| Coagulation factor VIII OS=Homo sapiens GN=F8 PE=1 SV=1                                | 0.00462385  |
| Multimerin-1 OS=Homo sapiens GN=MMRN1 PE=1 SV=3                                        | 0.003578458 |

**Identified Proteins****RPA (DC-Chol-DOPE)**

|                                                                                 |             |
|---------------------------------------------------------------------------------|-------------|
| Serum albumin OS=Homo sapiens GN=ALB PE=1 SV=2                                  | 5.549827975 |
| Apolipoprotein A-I OS=Homo sapiens GN=APOA1 PE=1 SV=1                           | 4.088307441 |
| Apolipoprotein C-III OS=Homo sapiens GN=APOC3 PE=1 SV=1                         | 3.097202607 |
| Apolipoprotein A-II OS=Homo sapiens GN=APOA2 PE=1 SV=1                          | 2.973314502 |
| Apolipoprotein C-II OS=Homo sapiens GN=APOC2 PE=1 SV=1                          | 2.849426398 |
| Hemoglobin subunit beta OS=Homo sapiens GN=HBB PE=1 SV=2                        | 2.810711365 |
| Apolipoprotein D OS=Homo sapiens GN=APOD PE=1 SV=1                              | 2.725538294 |
| Apolipoprotein C-I OS=Homo sapiens GN=APOC1 PE=1 SV=1                           | 2.725538294 |
| Apolipoprotein E OS=Homo sapiens GN=APOE PE=1 SV=1                              | 2.687683595 |
| Keratin, type II cytoskeletal 1 OS=Homo sapiens GN=KRT1 PE=1 SV=6               | 2.560354155 |
| Actin, cytoplasmic 1 OS=Homo sapiens GN=ACTB PE=1 SV=1                          | 2.498410103 |
| Ig kappa chain C region OS=Homo sapiens GN=IGKC PE=1 SV=1                       | 2.384846007 |
| Complement C3 OS=Homo sapiens GN=C3 PE=1 SV=2                                   | 2.295573697 |
| Ig lambda-2 chain C regions OS=Homo sapiens GN=IGLC2 PE=1 SV=1                  | 2.229985877 |
| Keratin, type I cytoskeletal 10 OS=Homo sapiens GN=KRT10 PE=1 SV=6              | 2.078800394 |
| Fibrinogen gamma chain OS=Homo sapiens GN=FGG PE=1 SV=3                         | 1.939325324 |
| Ig gamma-1 chain C region OS=Homo sapiens GN=IGHG1 PE=1 SV=1                    | 1.854880228 |
| Vitronectin OS=Homo sapiens GN=VTN PE=1 SV=1                                    | 1.791789064 |
| Hemoglobin subunit alpha OS=Homo sapiens GN=HBA1 PE=1 SV=2                      | 1.726174253 |
| Keratin, type I cytoskeletal 9 OS=Homo sapiens GN=KRT9 PE=1 SV=3                | 1.69247136  |
| Apolipoprotein B-100 OS=Homo sapiens GN=APOB PE=1 SV=2                          | 1.611025542 |
| Keratin, type II cytoskeletal 2 epidermal OS=Homo sapiens GN=KRT2 PE=1 SV=2     | 1.593391618 |
| Fibrinogen beta chain OS=Homo sapiens GN=FGB PE=1 SV=2                          | 1.581785617 |
| Alpha-1-antitrypsin OS=Homo sapiens GN=SERPINA1 PE=1 SV=3                       | 1.333774059 |
| Apolipoprotein A-IV OS=Homo sapiens GN=APOA4 PE=1 SV=3                          | 1.241634112 |
| Clusterin OS=Homo sapiens GN=CLU PE=1 SV=1                                      | 1.179319454 |
| Myosin light polypeptide 6 OS=Homo sapiens GN=MYL6 PE=1 SV=2                    | 1.122280474 |
| Fibrinogen alpha chain OS=Homo sapiens GN=FGA PE=1 SV=2                         | 1.118905194 |
| Serum amyloid A protein OS=Homo sapiens GN=SAA1 PE=1 SV=2                       | 1.070747187 |
| Myosin-9 OS=Homo sapiens GN=MYH9 PE=1 SV=4                                      | 1.038586178 |
| Actin, alpha cardiac muscle 1 OS=Homo sapiens GN=ACTC1 PE=1 SV=1                | 1.038300302 |
| C4b-binding protein alpha chain OS=Homo sapiens GN=C4BPA PE=1 SV=2              | 1.016991901 |
| Serotransferrin OS=Homo sapiens GN=TF PE=1 SV=3                                 | 0.973406534 |
| Cofilin-1 OS=Homo sapiens GN=CFL1 PE=1 SV=3                                     | 0.860696303 |
| Peptidyl-prolyl cis-trans isomerase A OS=Homo sapiens GN=PPIA PE=1 SV=2         | 0.832803368 |
| Ig gamma-2 chain C region OS=Homo sapiens GN=IGHG2 PE=1 SV=2                    | 0.757093971 |
| Ig mu chain C region OS=Homo sapiens GN=IGHM PE=1 SV=3                          | 0.723101996 |
| Inter-alpha-trypsin inhibitor heavy chain H2 OS=Homo sapiens GN=ITIH2 PE=1 SV=2 | 0.719953512 |
| Inter-alpha-trypsin inhibitor heavy chain H1 OS=Homo sapiens GN=ITIH1 PE=1 SV=3 | 0.688130955 |
| Myosin regulatory light chain 12A OS=Homo sapiens GN=MYL12A PE=1 SV=2           | 0.681384573 |
| Prothrombin OS=Homo sapiens GN=F2 PE=1 SV=2                                     | 0.681384573 |
| Keratin, type I cytoskeletal 16 OS=Homo sapiens GN=KRT16 PE=1 SV=4              | 0.641303128 |
| Talin-1 OS=Homo sapiens GN=TLN1 PE=1 SV=3                                       | 0.620817056 |
| Complement component C9 OS=Homo sapiens GN=C9 PE=1 SV=2                         | 0.605675176 |
| Erythrocyte band 7 integral membrane protein OS=Homo sapiens GN=STOM PE=1 SV    | 0.596211502 |
| Alpha-2-macroglobulin OS=Homo sapiens GN=A2M PE=1 SV=3                          | 0.593598831 |
| Ig kappa chain V-III region HAH OS=Homo sapiens PE=2 SV=1                       | 0.58404392  |
| Ras-related protein Rap-1b OS=Homo sapiens GN=RAP1B PE=1 SV=1                   | 0.58404392  |
| Complement C4-B OS=Homo sapiens GN=C4B PE=1 SV=1                                | 0.564878403 |
| Complement component C8 gamma chain OS=Homo sapiens GN=C8G PE=1 SV=3            | 0.557496469 |
| Transgelin-2 OS=Homo sapiens GN=TAGLN2 PE=1 SV=3                                | 0.557496469 |
| Profilin-1 OS=Homo sapiens GN=PFN1 PE=1 SV=2                                    | 0.545107659 |
| Integrin alpha-IIb OS=Homo sapiens GN=ITGA2B PE=1 SV=3                          | 0.542695678 |
| Tropomyosin alpha-4 chain OS=Homo sapiens GN=TPM4 PE=1 SV=3                     | 0.516912435 |
| Keratin, type II cytoskeletal 5 OS=Homo sapiens GN=KRT5 PE=1 SV=3               | 0.505543393 |

|                                                                                  |             |
|----------------------------------------------------------------------------------|-------------|
| Ig alpha-1 chain C region OS=Homo sapiens GN=IGHA1 PE=1 SV=2                     | 0.466210498 |
| Beta-parvin OS=Homo sapiens GN=PARVB PE=1 SV=1                                   | 0.454256382 |
| Tubulin beta-1 chain OS=Homo sapiens GN=TUBB1 PE=1 SV=1                          | 0.436086127 |
| Platelet glycoprotein Ib beta chain OS=Homo sapiens GN=GP1BB PE=1 SV=1           | 0.433608365 |
| Ig heavy chain V-III region VH26 OS=Homo sapiens PE=1 SV=1                       | 0.419313584 |
| Haptoglobin-related protein OS=Homo sapiens GN=HPR PE=1 SV=2                     | 0.419313584 |
| Filamin-A OS=Homo sapiens GN=FLNA PE=1 SV=4                                      | 0.417075255 |
| Glyceraldehyde-3-phosphate dehydrogenase OS=Homo sapiens GN=GAPDH PE=1 SV        | 0.416401684 |
| Complement C5 OS=Homo sapiens GN=C5 PE=1 SV=4                                    | 0.413180007 |
| 14-3-3 protein zeta/delta OS=Homo sapiens GN=YWHAZ PE=1 SV=1                     | 0.389362613 |
| Lipopolysaccharide-binding protein OS=Homo sapiens GN=LBP PE=1 SV=3              | 0.385689381 |
| Vitamin K-dependent protein S OS=Homo sapiens GN=PROS1 PE=1 SV=1                 | 0.381575361 |
| Tubulin alpha-1B chain OS=Homo sapiens GN=TUBA1B PE=1 SV=1                       | 0.381575361 |
| Thrombospondin-1 OS=Homo sapiens GN=THBS1 PE=1 SV=2                              | 0.380307669 |
| Vinculin OS=Homo sapiens GN=VCL PE=1 SV=4                                        | 0.373662508 |
| Apolipoprotein L1 OS=Homo sapiens GN=APOL1 PE=1 SV=5                             | 0.371664313 |
| Serum amyloid A-4 protein OS=Homo sapiens GN=SAA4 PE=1 SV=2                      | 0.363405106 |
| Apolipoprotein C-IV OS=Homo sapiens GN=APOC4 PE=1 SV=1                           | 0.363405106 |
| Tubulin beta chain OS=Homo sapiens GN=TUBB PE=1 SV=2                             | 0.354319978 |
| Apolipoprotein F OS=Homo sapiens GN=APOF PE=1 SV=2                               | 0.350426352 |
| Serum paraoxonase/arylesterase 1 OS=Homo sapiens GN=PON1 PE=1 SV=3               | 0.340692287 |
| Alpha-1-antichymotrypsin OS=Homo sapiens GN=SERPINA3 PE=1 SV=2                   | 0.340692287 |
| Angiotensinogen OS=Homo sapiens GN=AGT PE=1 SV=1                                 | 0.33426413  |
| Haptoglobin OS=Homo sapiens GN=HP PE=1 SV=1                                      | 0.333121347 |
| Integrin beta-3 OS=Homo sapiens GN=ITGB3 PE=1 SV=2                               | 0.313280264 |
| Gelsolin OS=Homo sapiens GN=GSN PE=1 SV=1                                        | 0.301076905 |
| Phosphatidylcholine-sterol acyltransferase OS=Homo sapiens GN=LCAT PE=1 SV=1     | 0.299809212 |
| Immunoglobulin lambda-like polypeptide 5 OS=Homo sapiens GN=IGLL5 PE=2 SV=2      | 0.296254162 |
| Platelet basic protein OS=Homo sapiens GN=PPBP PE=1 SV=3                         | 0.29202196  |
| ATP synthase subunit beta, mitochondrial OS=Homo sapiens GN=ATP5B PE=1 SV=3      | 0.286898768 |
| Protein AMBP OS=Homo sapiens GN=AMBP PE=1 SV=1                                   | 0.279542389 |
| Fermitin family homolog 3 OS=Homo sapiens GN=FERMT3 PE=1 SV=1                    | 0.268967595 |
| Integrin-linked protein kinase OS=Homo sapiens GN=ILK PE=1 SV=2                  | 0.267209637 |
| Dermcidin OS=Homo sapiens GN=DCD PE=1 SV=2                                       | 0.247776209 |
| Alpha-actinin-1 OS=Homo sapiens GN=ACTN1 PE=1 SV=2                               | 0.238153831 |
| Vitamin D-binding protein OS=Homo sapiens GN=GC PE=1 SV=1                        | 0.231413629 |
| Glutathione peroxidase 3 OS=Homo sapiens GN=GPX3 PE=1 SV=2                       | 0.209656792 |
| Ig kappa chain V-II region GM607 (Fragment) OS=Homo sapiens PE=4 SV=1            | 0.209656792 |
| Alpha-enolase OS=Homo sapiens GN=ENO1 PE=1 SV=2                                  | 0.202965618 |
| Coagulation factor XIII A chain OS=Homo sapiens GN=F13A1 PE=1 SV=4               | 0.197026865 |
| Heat shock cognate 71 protein OS=Homo sapiens GN=HSPA8 PE=1 SV=1                 | 0.191939316 |
| Complement component C6 OS=Homo sapiens GN=C6 PE=1 SV=3                          | 0.181702553 |
| Alpha-1-acid glycoprotein 1 OS=Homo sapiens GN=ORM1 PE=1 SV=1                    | 0.170346143 |
| Ras suppressor protein 1 OS=Homo sapiens GN=RSU1 PE=1 SV=3                       | 0.170346143 |
| Apolipoprotein(a) OS=Homo sapiens GN=LPA PE=1 SV=1                               | 0.152325493 |
| Cholesteryl ester transfer protein OS=Homo sapiens GN=CETP PE=1 SV=2             | 0.148665725 |
| Complement component C8 alpha chain OS=Homo sapiens GN=C8A PE=1 SV=2             | 0.146759754 |
| Inter-alpha-trypsin inhibitor heavy chain H4 OS=Homo sapiens GN=ITIH4 PE=1 SV=4  | 0.145538453 |
| Ceruloplasmin OS=Homo sapiens GN=CP PE=1 SV=1                                    | 0.145213106 |
| Complement component C7 OS=Homo sapiens GN=C7 PE=1 SV=2                          | 0.144975441 |
| Pleckstrin OS=Homo sapiens GN=PLEK PE=1 SV=3                                     | 0.136276915 |
| Histidine-rich glycoprotein OS=Homo sapiens GN=HRG PE=1 SV=1                     | 0.136276915 |
| Guanine nucleotide-binding protein G(i) subunit alpha-2 OS=Homo sapiens GN=GNAI1 | 0.136276915 |
| Tubulin alpha-4A chain OS=Homo sapiens GN=TUBA4A PE=1 SV=1                       | 0.136276915 |
| Alpha-1B-glycoprotein OS=Homo sapiens GN=A1BG PE=1 SV=4                          | 0.126182328 |
| ATP synthase subunit alpha, mitochondrial OS=Homo sapiens GN=ATP5A1 PE=1 SV=     | 0.113564096 |

|                                                                                       |             |
|---------------------------------------------------------------------------------------|-------------|
| Inter-alpha-trypsin inhibitor heavy chain H3 OS=Homo sapiens GN=ITIH3 PE=1 SV=2       | 0.109021532 |
| Ras-related protein Rab-27B OS=Homo sapiens GN=RAB27B PE=1 SV=4                       | 0.109021532 |
| Hyaluronan-binding protein 2 OS=Homo sapiens GN=HABP2 PE=1 SV=1                       | 0.108156282 |
| Band 3 anion transport protein OS=Homo sapiens GN=SLC4A1 PE=1 SV=3                    | 0.106883855 |
| Isocitrate dehydrogenase [NADP], mitochondrial OS=Homo sapiens GN=IDH2 PE=1 S         | 0.106883855 |
| Hemopexin OS=Homo sapiens GN=HPX PE=1 SV=2                                            | 0.104828396 |
| Complement C1q subcomponent subunit C OS=Homo sapiens GN=C1QC PE=1 SV=3               | 0.104828396 |
| Antithrombin-III OS=Homo sapiens GN=SERPINC1 PE=1 SV=1                                | 0.102850502 |
| Complement component C8 beta chain OS=Homo sapiens GN=C8B PE=1 SV=3                   | 0.10169919  |
| Plasminogen OS=Homo sapiens GN=PLG PE=1 SV=2                                          | 0.089852911 |
| Thromboxane-A synthase OS=Homo sapiens GN=TBXAS1 PE=1 SV=3                            | 0.089361911 |
| Kininogen-1 OS=Homo sapiens GN=KNG1 PE=1 SV=2                                         | 0.075709397 |
| Sarcoplasmic/endoplasmic reticulum calcium ATPase 3 OS=Homo sapiens GN=ATP2A          | 0.071724692 |
| Complement factor B OS=Homo sapiens GN=CFB PE=1 SV=2                                  | 0.063384611 |
| Protein Z-dependent protease inhibitor OS=Homo sapiens GN=SERPINA10 PE=1 SV=          | 0.053441927 |
| Coagulation factor IX OS=Homo sapiens GN=F9 PE=1 SV=2                                 | 0.052414198 |
| Solute carrier family 2, facilitated glucose transporter member 3 OS=Homo sapiens GN= | 0.050472931 |
| Complement factor H OS=Homo sapiens GN=CFH PE=1 SV=4                                  | 0.049020473 |
| Pyruvate kinase isozymes M1/M2 OS=Homo sapiens GN=PKM2 PE=1 SV=4                      | 0.04699204  |
| Multimerin-1 OS=Homo sapiens GN=MMRN1 PE=1 SV=3                                       | 0.039500555 |
| Integrin beta-1 OS=Homo sapiens GN=ITGB1 PE=1 SV=2                                    | 0.030972026 |
| von Willebrand factor OS=Homo sapiens GN=VWF PE=1 SV=4                                | 0.022051281 |
| Clathrin heavy chain 1 OS=Homo sapiens GN=CLTC PE=1 SV=5                              | 0.014195512 |

**Identified Proteins****RPA (DC-Chol-cholesterol)**

|                                                                                 |             |
|---------------------------------------------------------------------------------|-------------|
| Complement C4-B OS=Homo sapiens GN=C4B PE=1 SV=1                                | 3.584674451 |
| Serum albumin OS=Homo sapiens GN=ALB PE=1 SV=2                                  | 3.047536185 |
| Inter-alpha-trypsin inhibitor heavy chain H2 OS=Homo sapiens GN=ITIH2 PE=1 SV=2 | 2.935314975 |
| Prothrombin OS=Homo sapiens GN=F2 PE=1 SV=2                                     | 2.699680695 |
| Ig gamma-1 chain C region OS=Homo sapiens GN=IGHG1 PE=1 SV=1                    | 2.653827878 |
| Fibrinogen beta chain OS=Homo sapiens GN=FGB PE=1 SV=2                          | 2.605157289 |
| Vitamin K-dependent protein S OS=Homo sapiens GN=PROS1 PE=1 SV=1                | 2.440087146 |
| Ig kappa chain C region OS=Homo sapiens GN=IGKC PE=1 SV=1                       | 2.407272923 |
| C4b-binding protein alpha chain OS=Homo sapiens GN=C4BPA PE=1 SV=2              | 2.117227949 |
| Vitronectin OS=Homo sapiens GN=VTN PE=1 SV=1                                    | 1.92462292  |
| Apolipoprotein A-I OS=Homo sapiens GN=APOA1 PE=1 SV=1                           | 1.874106871 |
| Inter-alpha-trypsin inhibitor heavy chain H1 OS=Homo sapiens GN=ITIH1 PE=1 SV=3 | 1.632988281 |
| Ig gamma-3 chain C region OS=Homo sapiens GN=IGHG3 PE=1 SV=2                    | 1.609878118 |
| Complement C3 OS=Homo sapiens GN=C3 PE=1 SV=2                                   | 1.562034114 |
| Inter-alpha-trypsin inhibitor heavy chain H3 OS=Homo sapiens GN=ITIH3 PE=1 SV=2 | 1.505688695 |
| Fibrinogen gamma chain OS=Homo sapiens GN=FGG PE=1 SV=3                         | 1.399673513 |
| Protein AMBP OS=Homo sapiens GN=AMBP PE=1 SV=1                                  | 1.200015724 |
| Ig gamma-2 chain C region OS=Homo sapiens GN=IGHG2 PE=1 SV=2                    | 1.178980966 |
| Fibrinogen alpha chain OS=Homo sapiens GN=FGA PE=1 SV=2                         | 1.049828638 |
| Ig lambda-2 chain C regions OS=Homo sapiens GN=IGLC2 PE=1 SV=1                  | 1.041643743 |
| Vitamin K-dependent protein Z OS=Homo sapiens GN=PROZ PE=1 SV=2                 | 0.918080996 |
| Protein Z-dependent protease inhibitor OS=Homo sapiens GN=SERPINA10 PE=1 SV=    | 0.81640015  |
| Apolipoprotein A-II OS=Homo sapiens GN=APOA2 PE=1 SV=1                          | 0.660196739 |
| Apolipoprotein E OS=Homo sapiens GN=APOE PE=1 SV=1                              | 0.623111613 |
| Vitamin K-dependent protein C OS=Homo sapiens GN=PROC PE=1 SV=1                 | 0.608283833 |
| Alpha-1-antitrypsin OS=Homo sapiens GN=SERPINA1 PE=1 SV=3                       | 0.590587343 |
| Keratin, type II cytoskeletal 1 OS=Homo sapiens GN=KRT1 PE=1 SV=6               | 0.562389814 |
| Apolipoprotein C-II OS=Homo sapiens GN=APOC2 PE=1 SV=1                          | 0.557499468 |
| Ig mu chain C region OS=Homo sapiens GN=IGHM PE=1 SV=3                          | 0.546720746 |
| Coagulation factor IX OS=Homo sapiens GN=F9 PE=1 SV=2                           | 0.536903587 |
| Apolipoprotein B-100 OS=Homo sapiens GN=APOB PE=1 SV=2                          | 0.531995744 |
| C-reactive protein OS=Homo sapiens GN=CRP PE=1 SV=1                             | 0.51642056  |
| Apolipoprotein C-III OS=Homo sapiens GN=APOC3 PE=1 SV=1                         | 0.513486352 |
| Collectin-11 OS=Homo sapiens GN=COLEC11 PE=1 SV=1                               | 0.489709152 |
| Clusterin OS=Homo sapiens GN=CLU PE=1 SV=1                                      | 0.481040786 |
| Hyaluronan-binding protein 2 OS=Homo sapiens GN=HABP2 PE=1 SV=1                 | 0.479021055 |
| Ig alpha-1 chain C region OS=Homo sapiens GN=IGHA1 PE=1 SV=2                    | 0.441675479 |
| Hemoglobin subunit beta OS=Homo sapiens GN=HBB PE=1 SV=2                        | 0.43371258  |
| Coagulation factor X OS=Homo sapiens GN=F10 PE=1 SV=2                           | 0.399052251 |
| Apolipoprotein A-IV OS=Homo sapiens GN=APOA4 PE=1 SV=3                          | 0.398074182 |
| Keratin, type I cytoskeletal 10 OS=Homo sapiens GN=KRT10 PE=1 SV=6              | 0.380203696 |
| Serum paraoxonase/arylesterase 1 OS=Homo sapiens GN=PON1 PE=1 SV=3              | 0.379246349 |
| Lumican OS=Homo sapiens GN=LUM PE=1 SV=2                                        | 0.365231646 |
| Serotransferrin OS=Homo sapiens GN=TF PE=1 SV=3                                 | 0.364680103 |
| Keratin, type II cytoskeletal 2 epidermal OS=Homo sapiens GN=KRT2 PE=1 SV=2     | 0.347590762 |
| Alpha-2-macroglobulin OS=Homo sapiens GN=A2M PE=1 SV=3                          | 0.338603971 |
| Alpha-1-acid glycoprotein 1 OS=Homo sapiens GN=ORM1 PE=1 SV=1                   | 0.336211302 |
| Hemoglobin subunit alpha OS=Homo sapiens GN=HBA1 PE=1 SV=2                      | 0.333521612 |
| Angiotensinogen OS=Homo sapiens GN=AGT PE=1 SV=1                                | 0.32276285  |
| C4b-binding protein beta chain OS=Homo sapiens GN=C4BPB PE=1 SV=1               | 0.32276285  |
| Heparin cofactor 2 OS=Homo sapiens GN=SERPIND1 PE=1 SV=3                        | 0.305775332 |
| Coagulation factor VII OS=Homo sapiens GN=F7 PE=1 SV=1                          | 0.288624472 |
| Immunoglobulin lambda-like polypeptide 5 OS=Homo sapiens GN=IGLL5 PE=2 SV=2     | 0.273646764 |
| Keratin, type I cytoskeletal 9 OS=Homo sapiens GN=KRT9 PE=1 SV=3                | 0.257689695 |
| Apolipoprotein F OS=Homo sapiens GN=APOF PE=1 SV=2                              | 0.253599382 |

|                                                                                  |             |
|----------------------------------------------------------------------------------|-------------|
| Haptoglobin OS=Homo sapiens GN=HP PE=1 SV=1                                      | 0.251037772 |
| Actin, cytoplasmic 1 OS=Homo sapiens GN=ACTB PE=1 SV=1                           | 0.238229723 |
| Histidine-rich glycoprotein OS=Homo sapiens GN=HRG PE=1 SV=1                     | 0.234003066 |
| Tubulin alpha-4A chain OS=Homo sapiens GN=TUBA4A PE=1 SV=1                       | 0.225933995 |
| Ig kappa chain V-III region HAH OS=Homo sapiens PE=2 SV=1                        | 0.219017648 |
| Collectin-10 OS=Homo sapiens GN=COLEC10 PE=2 SV=2                                | 0.203028244 |
| Haptoglobin-related protein OS=Homo sapiens GN=HPR PE=1 SV=2                     | 0.202761278 |
| Tubulin alpha-1B chain OS=Homo sapiens GN=TUBA1B PE=1 SV=1                       | 0.196885338 |
| Profilin-1 OS=Homo sapiens GN=PFN1 PE=1 SV=2                                     | 0.19365771  |
| Complement factor I OS=Homo sapiens GN=CFI PE=1 SV=2                             | 0.193168675 |
| Ig heavy chain V-III region VH26 OS=Homo sapiens PE=1 SV=1                       | 0.186209337 |
| Cartilage oligomeric matrix protein OS=Homo sapiens GN=COMP PE=1 SV=2            | 0.184713679 |
| Lipopolysaccharide-binding protein OS=Homo sapiens GN=LBP PE=1 SV=3              | 0.182695953 |
| Complement component C9 OS=Homo sapiens GN=C9 PE=1 SV=2                          | 0.181874304 |
| Myosin light polypeptide 6 OS=Homo sapiens GN=MYL6 PE=1 SV=2                     | 0.180367475 |
| Tubulin beta-1 chain OS=Homo sapiens GN=TUBB1 PE=1 SV=1                          | 0.177519567 |
| Kininogen-1 OS=Homo sapiens GN=KNG1 PE=1 SV=2                                    | 0.177071286 |
| Angiopoietin-related protein 6 OS=Homo sapiens GN=ANGPTL6 PE=1 SV=1              | 0.173795381 |
| Mannan-binding lectin serine protease 1 OS=Homo sapiens GN=MASP1 PE=1 SV=3       | 0.171595439 |
| Secreted phosphoprotein 24 OS=Homo sapiens GN=SPP2 PE=1 SV=1                     | 0.168105651 |
| Tubulin beta chain OS=Homo sapiens GN=TUBB PE=1 SV=2                             | 0.164609053 |
| Alpha-1-acid glycoprotein 2 OS=Homo sapiens GN=ORM2 PE=1 SV=2                    | 0.147932973 |
| Ig kappa chain V-III region VG (Fragment) OS=Homo sapiens PE=1 SV=1              | 0.136553513 |
| Fibronectin OS=Homo sapiens GN=FN1 PE=1 SV=4                                     | 0.136223104 |
| Endoplasmin OS=Homo sapiens GN=HSP90B1 PE=1 SV=1                                 | 0.13331509  |
| Plasma protease C1 inhibitor OS=Homo sapiens GN=SERPING1 PE=1 SV=2               | 0.126170932 |
| Apolipoprotein C-I OS=Homo sapiens GN=APOC1 PE=1 SV=1                            | 0.125518886 |
| Complement C5 OS=Homo sapiens GN=C5 PE=1 SV=4                                    | 0.125328128 |
| Complement C1q subcomponent subunit C OS=Homo sapiens GN=C1QC PE=1 SV=3          | 0.11793258  |
| Ras-related protein Rap-1A OS=Homo sapiens GN=RAP1A PE=1 SV=1                    | 0.115272446 |
| Gelsolin OS=Homo sapiens GN=GSN PE=1 SV=1                                        | 0.106962107 |
| Glucosidase 2 subunit beta OS=Homo sapiens GN=PRKCSH PE=1 SV=2                   | 0.106675857 |
| Extracellular superoxide dismutase [Cu-Zn] OS=Homo sapiens GN=SOD3 PE=1 SV=2     | 0.105518624 |
| Transthyretin OS=Homo sapiens GN=TTR PE=1 SV=1                                   | 0.100863391 |
| Ig kappa chain V-IV region Len OS=Homo sapiens PE=1 SV=2                         | 0.099311646 |
| Thrombospondin-1 OS=Homo sapiens GN=THBS1 PE=1 SV=2                              | 0.098830485 |
| 78 glucose-regulated protein OS=Homo sapiens GN=HSPA5 PE=1 SV=2                  | 0.098621982 |
| Hemopexin OS=Homo sapiens GN=HPX PE=1 SV=2                                       | 0.096208157 |
| Kallistatin OS=Homo sapiens GN=SERPINA4 PE=1 SV=3                                | 0.095511456 |
| Alpha-1-antichymotrypsin OS=Homo sapiens GN=SERPINA3 PE=1 SV=2                   | 0.087414939 |
| Proprotein convertase subtilisin/kexin type 9 OS=Homo sapiens GN=PCSK9 PE=1 SV=3 | 0.087233203 |
| Tropomyosin alpha-4 chain OS=Homo sapiens GN=TPM4 PE=1 SV=3                      | 0.083473151 |
| 14-3-3 protein zeta/delta OS=Homo sapiens GN=YWHAZ PE=1 SV=1                     | 0.080690712 |
| Alpha-1B-glycoprotein OS=Homo sapiens GN=A1BG PE=1 SV=4                          | 0.080690712 |
| Inter-alpha-trypsin inhibitor heavy chain H4 OS=Homo sapiens GN=ITIH4 PE=1 SV=4  | 0.079907308 |
| Osteomodulin OS=Homo sapiens GN=OMD PE=1 SV=1                                    | 0.079043963 |
| Complement C1q subcomponent subunit B OS=Homo sapiens GN=C1QB PE=1 SV=3          | 0.077702168 |
| Apolipoprotein M OS=Homo sapiens GN=APOM PE=1 SV=2                               | 0.076848298 |
| Complement C1r subcomponent OS=Homo sapiens GN=C1R PE=1 SV=2                     | 0.076656177 |
| Antithrombin-III OS=Homo sapiens GN=SERPINC1 PE=1 SV=1                           | 0.073078381 |
| Immunoglobulin J chain OS=Homo sapiens GN=IGJ PE=1 SV=4                          | 0.071725078 |
| Ig lambda chain V-III region LOI OS=Homo sapiens PE=1 SV=1                       | 0.06724226  |
| Alpha-2-HS-glycoprotein OS=Homo sapiens GN=AHSG PE=1 SV=1                        | 0.066207764 |
| Thrombospondin-4 OS=Homo sapiens GN=THBS4 PE=1 SV=2                              | 0.06546605  |
| Apolipoprotein L1 OS=Homo sapiens GN=APOL1 PE=1 SV=5                             | 0.062351914 |
| Vitamin D-binding protein OS=Homo sapiens GN=GC PE=1 SV=1                        | 0.060898651 |

|                                                                                       |             |
|---------------------------------------------------------------------------------------|-------------|
| Apolipoprotein A-V OS=Homo sapiens GN=APOA5 PE=1 SV=1                                 | 0.059041985 |
| Complement component C6 OS=Homo sapiens GN=C6 PE=1 SV=3                               | 0.058404706 |
| Keratin, type II cytoskeletal 5 OS=Homo sapiens GN=KRT5 PE=1 SV=3                     | 0.057264377 |
| Ceruloplasmin OS=Homo sapiens GN=CP PE=1 SV=1                                         | 0.056880338 |
| Plasminogen OS=Homo sapiens GN=PLG PE=1 SV=2                                          | 0.056749512 |
| Myosin-9 OS=Homo sapiens GN=MYH9 PE=1 SV=4                                            | 0.054030785 |
| Ig kappa chain V-I region AG OS=Homo sapiens PE=1 SV=1                                | 0.053793808 |
| Protein disulfide-isomerase OS=Homo sapiens GN=P4HB PE=1 SV=3                         | 0.053793808 |
| Complement C1s subcomponent OS=Homo sapiens GN=C1S PE=1 SV=1                          | 0.050300704 |
| Integrin alpha-IIb OS=Homo sapiens GN=ITGA2B PE=1 SV=3                                | 0.047129089 |
| Alpha-2-antiplasmin OS=Homo sapiens GN=SERPINF2 PE=1 SV=3                             | 0.046947324 |
| Apolipoprotein C-IV OS=Homo sapiens GN=APOC4 PE=1 SV=1                                | 0.043035047 |
| Serum amyloid A-4 protein OS=Homo sapiens GN=SAA4 PE=1 SV=2                           | 0.043035047 |
| Selenoprotein P OS=Homo sapiens GN=SEPP1 PE=1 SV=3                                    | 0.04128362  |
| Pleckstrin OS=Homo sapiens GN=PLEK PE=1 SV=3                                          | 0.040345356 |
| Coagulation factor V OS=Homo sapiens GN=F5 PE=1 SV=4                                  | 0.039704954 |
| Thyroxine-binding globulin OS=Homo sapiens GN=SERPINA7 PE=1 SV=2                      | 0.035082918 |
| SPARC-like protein 1 OS=Homo sapiens GN=SPARCL1 PE=1 SV=2                             | 0.034428037 |
| Complement component C8 beta chain OS=Homo sapiens GN=C8B PE=1 SV=3                   | 0.033721492 |
| Complement factor H OS=Homo sapiens GN=CFH PE=1 SV=4                                  | 0.033669506 |
| Nidogen-1 OS=Homo sapiens GN=NID1 PE=1 SV=3                                           | 0.033225587 |
| Integrin-linked protein kinase OS=Homo sapiens GN=ILK PE=1 SV=2                       | 0.031643417 |
| Extracellular matrix protein 2 OS=Homo sapiens GN=ECM2 PE=2 SV=1                      | 0.030259017 |
| Talin-1 OS=Homo sapiens GN=TLN1 PE=1 SV=3                                             | 0.02928774  |
| Fermitin family homolog 3 OS=Homo sapiens GN=FERMT3 PE=1 SV=1                         | 0.027604717 |
| Phospholipid transfer protein OS=Homo sapiens GN=PLTP PE=1 SV=1                       | 0.02640787  |
| Bone marrow proteoglycan OS=Homo sapiens GN=PRG2 PE=1 SV=2                            | 0.025821028 |
| Myosin regulatory light chain 12A OS=Homo sapiens GN=MYL12A PE=1 SV=2                 | 0.024207214 |
| Intelectin-1 OS=Homo sapiens GN=ITLN1 PE=1 SV=1                                       | 0.023054489 |
| Apolipoprotein D OS=Homo sapiens GN=APOD PE=1 SV=1                                    | 0.023054489 |
| Proteasome subunit alpha type-4 OS=Homo sapiens GN=PSMA4 PE=1 SV=1                    | 0.022259507 |
| Retinol-binding protein 4 OS=Homo sapiens GN=RBP4 PE=1 SV=3                           | 0.021049751 |
| Complement factor B OS=Homo sapiens GN=CFB PE=1 SV=2                                  | 0.02064181  |
| Glutathione peroxidase 3 OS=Homo sapiens GN=GPX3 PE=1 SV=2                            | 0.018620934 |
| Complement component C8 alpha chain OS=Homo sapiens GN=C8A PE=1 SV=2                  | 0.017379538 |
| Insulin-like growth factor-binding protein complex acid labile subunit OS=Homo sapien | 0.017116212 |
| Afamin OS=Homo sapiens GN=AFM PE=1 SV=1                                               | 0.016372029 |
| Sex hormone-binding globulin OS=Homo sapiens GN=SHBG PE=1 SV=2                        | 0.014671039 |
| Apolipoprotein(a) OS=Homo sapiens GN=LPA PE=1 SV=1                                    | 0.0138511   |
| Dickkopf-related protein 3 OS=Homo sapiens GN=DKK3 PE=1 SV=2                          | 0.012740639 |
| Filamin-A OS=Homo sapiens GN=FLNA PE=1 SV=4                                           | 0.012634845 |
| Collagen alpha-1(XVIII) chain OS=Homo sapiens GN=COL18A1 PE=1 SV=5                    | 0.011786284 |
| Endosialin OS=Homo sapiens GN=CD248 PE=1 SV=1                                         | 0.009961816 |
| Integrin beta-3 OS=Homo sapiens GN=ITGB3 PE=1 SV=2                                    | 0.009274795 |
| Carboxypeptidase N subunit 2 OS=Homo sapiens GN=CPN2 PE=1 SV=3                        | 0.007936791 |
| CD44 antigen OS=Homo sapiens GN=CD44 PE=1 SV=3                                        | 0.007872265 |
| von Willebrand factor OS=Homo sapiens GN=VWF PE=1 SV=4                                | 0.00783405  |
| Calreticulin OS=Homo sapiens GN=CALR PE=1 SV=1                                        | 0.006724226 |
| Band 3 anion transport protein OS=Homo sapiens GN=SLC4A1 PE=1 SV=3                    | 0.006328683 |
| N-acetylmuramoyl-L-alanine amidase OS=Homo sapiens GN=PGLYRP2 PE=1 SV=1               | 0.005205852 |
| Vinculin OS=Homo sapiens GN=VCL PE=1 SV=4                                             | 0.005205852 |
| Neural cell adhesion molecule 1 OS=Homo sapiens GN=NCAM1 PE=1 SV=3                    | 0.005096256 |
| Proteoglycan 4 OS=Homo sapiens GN=PRG4 PE=1 SV=2                                      | 0.004275005 |
| Neuropilin-1 OS=Homo sapiens GN=NRP1 PE=1 SV=3                                        | 0.00313362  |
| Coagulation factor VIII OS=Homo sapiens GN=F8 PE=1 SV=1                               | 0.003022124 |
| Multimerin-1 OS=Homo sapiens GN=MMRN1 PE=1 SV=3                                       | 0.002338861 |
